# Supplementary material
Source: PubMed Central journal article supplement (PMC4715251)
Supplement: supp_mev049_Supplementary_Materials___Additional_figures_05_15_2015.pdf [file supp_mev049_Supplementary_Materials___Additional_figures_05_15_2015.pdf]

## SUPPLEMENTARY MATERIALS

### A COMPARISON OF THE $\beta$ -SUBSTITUTION METHOD AND A BAYESIAN METHOD FOR ANALYZING LEFT-CENSORED DATA

Tran Huynh<sup>1</sup>, Harrison Quick<sup>2</sup>, Gurumurthy Ramachandran<sup>1\*</sup>, Sudipto Banerjee<sup>2</sup>, Mark Stenzel<sup>3</sup>, Aaron Blair<sup>4</sup>, Dale P. Sandler<sup>5</sup>, Lawrence S. Engel<sup>5,6</sup>, Richard K. Kwok<sup>5</sup>, and Patricia A. Stewart<sup>7</sup>.

<sup>1</sup> Division of Environmental Health Sciences, University of Minnesota, Minneapolis, MN US

<sup>2</sup> Division of Biostatistics, University of Minnesota, Minneapolis, MN US

<sup>3</sup> Exposure Assessment Applications, LLC, Arlington, VA US

<sup>4</sup> National Cancer Institute, Gaithersburg, MD US

<sup>5</sup> Epidemiology Branch, National Institute of Environmental Health Sciences, Research Triangle Park, NC US

<sup>6</sup> Department of Epidemiology, University of North Carolina at Chapel Hill, Chapel Hill, NC US

<sup>7</sup> Stewart Exposure Assessments, LLC, Arlington, VA US

\*Address correspondence to: Gurumurthy Ramachandran. University of Minnesota, Division of Environmental Health Sciences, School of Public Health, Minneapolis, MN 420 Delaware St. S.E., Minneapolis, MN 55455, USA; email: ramac002@umn.edu

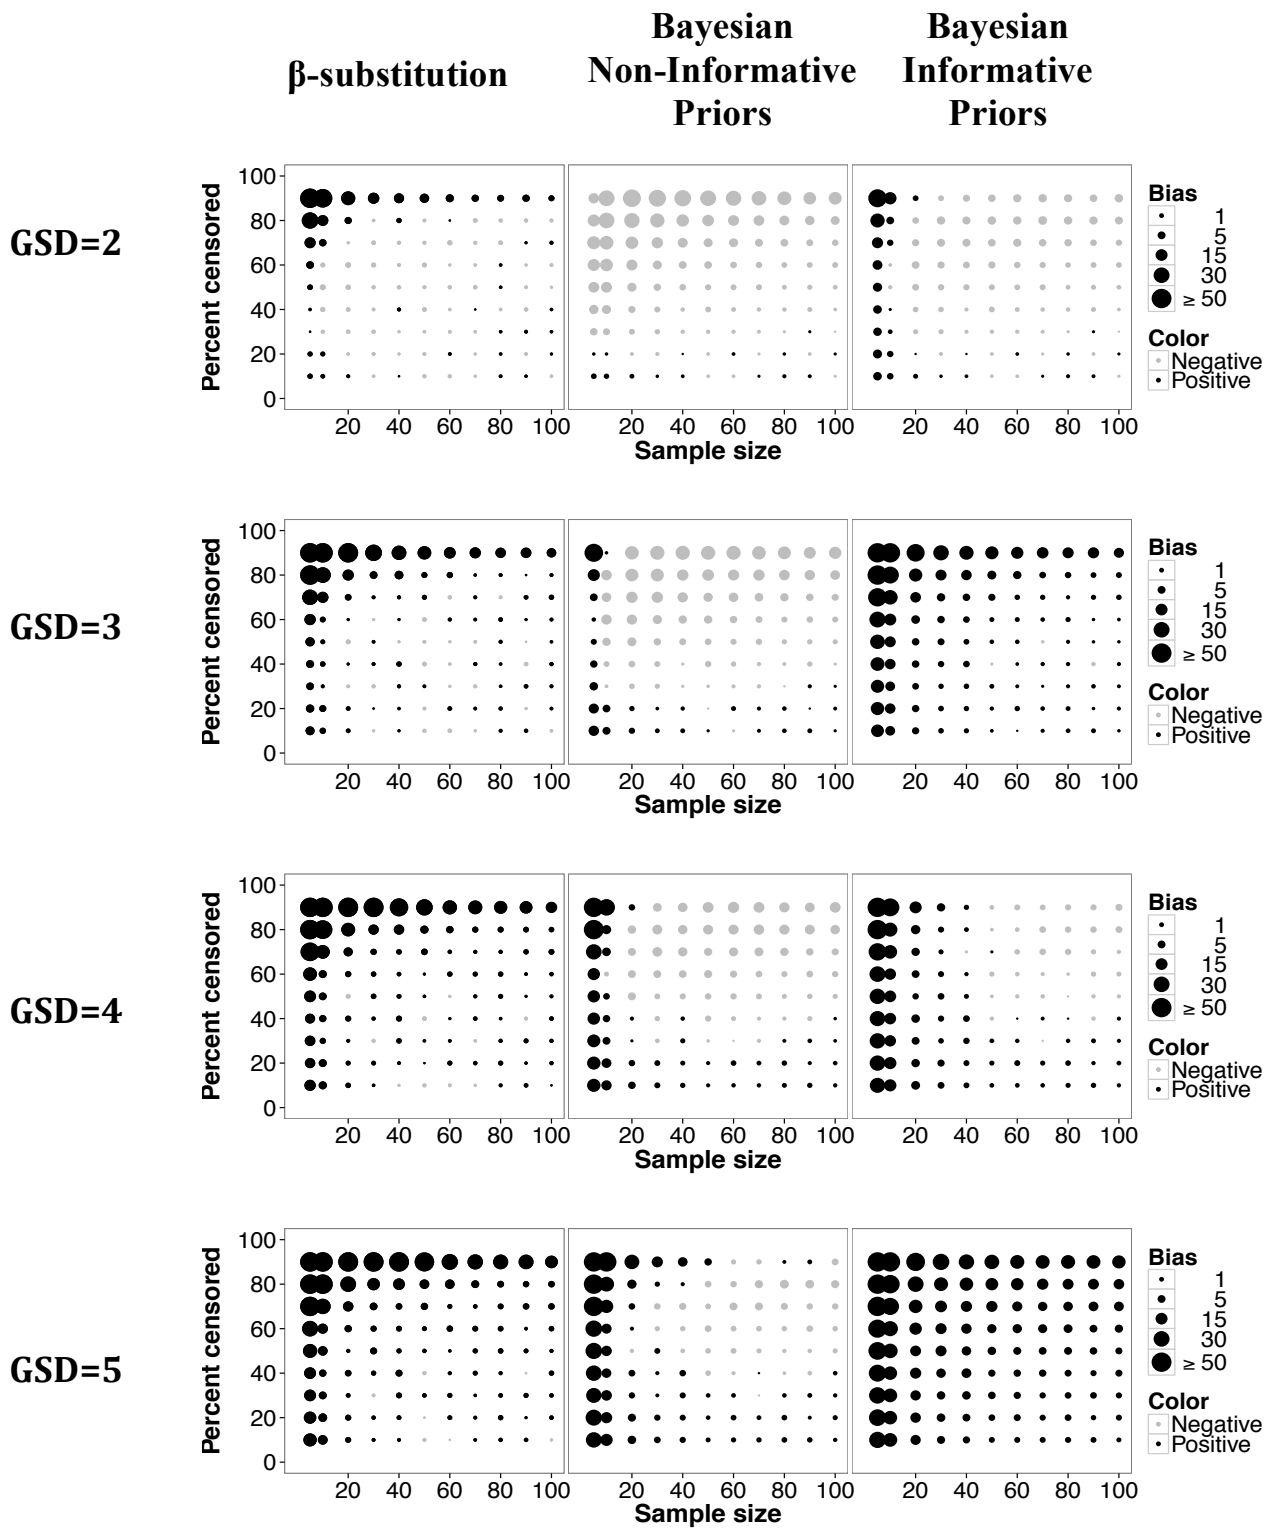

Figure 1: Relative bias in the estimate of the GM of a lognormal distribution and a single LOD for different sample sizes, percent censoring, and GSDs for the  $\beta$ -substitution method and the Bayesian method with non-informative priors.

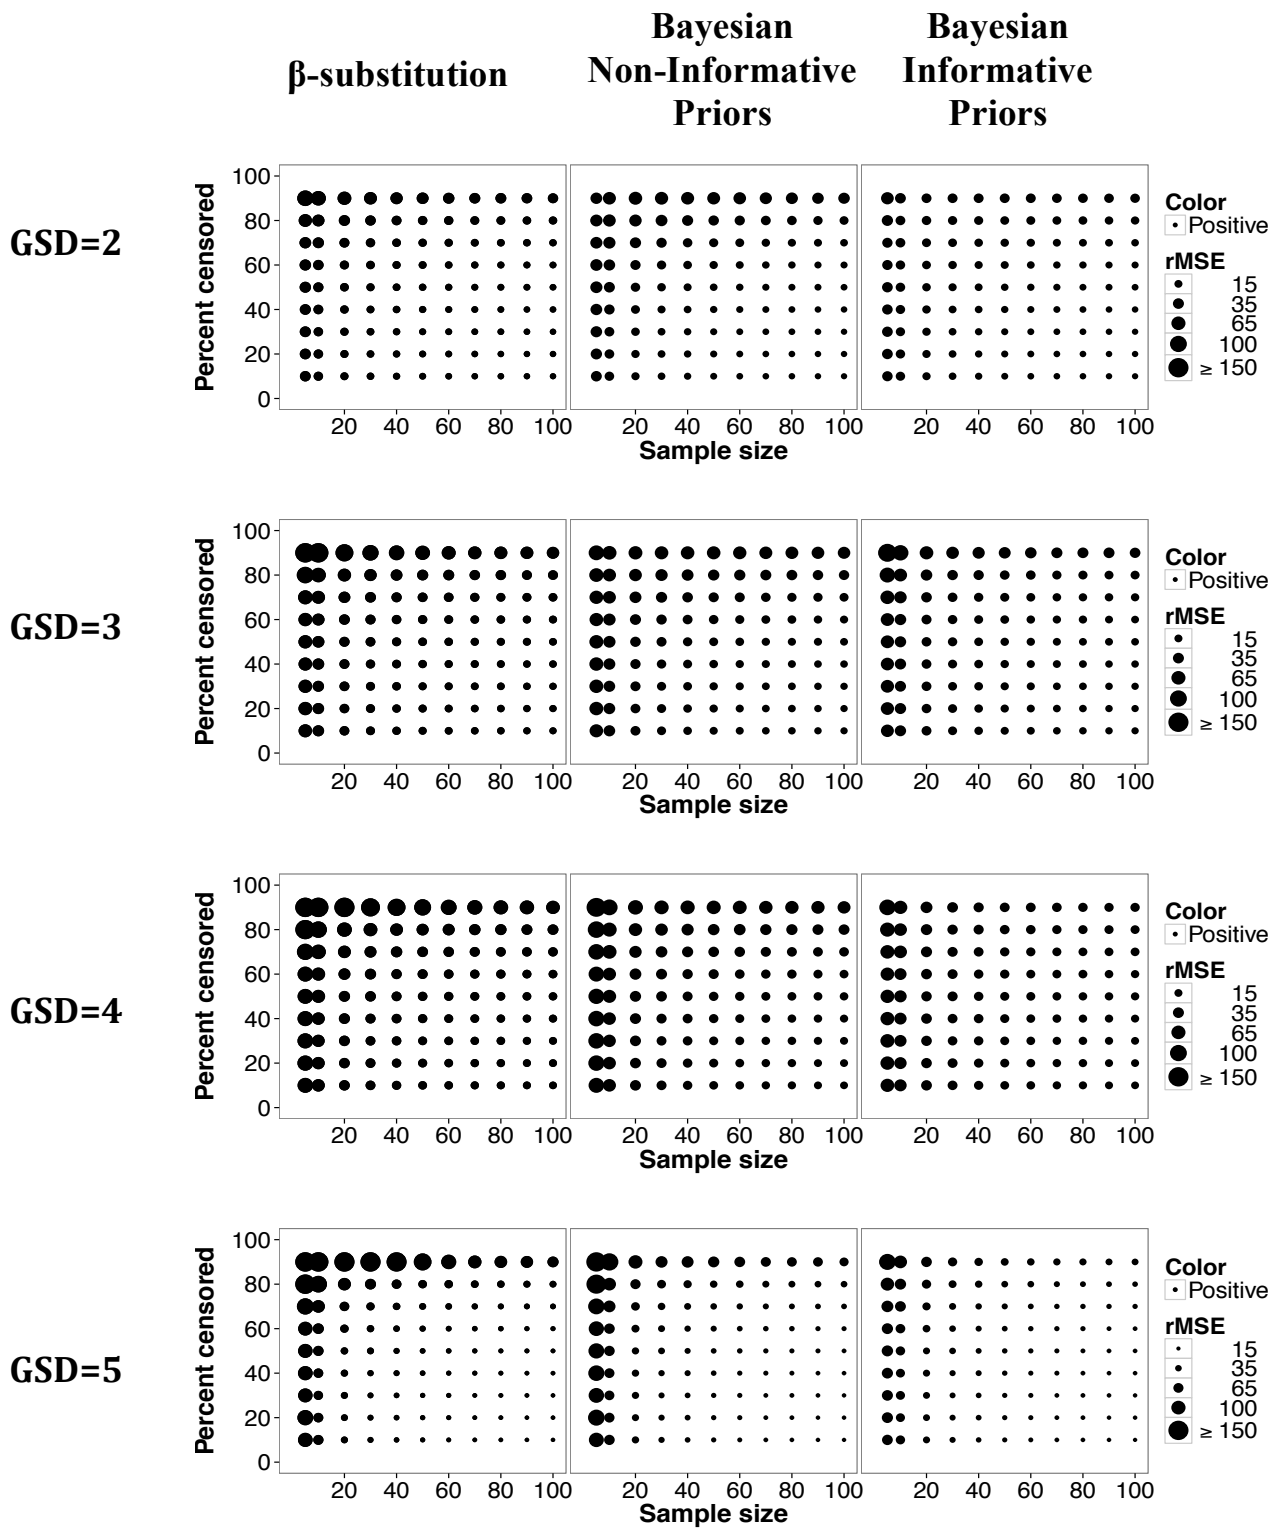

Figure 2: Relative rMSE in the estimate of the GM of a lognormal distribution and a single LOD for different sample sizes, percent censoring, and GSDs for the  $\beta$ -substitution method and the Bayesian method with non-informative priors.

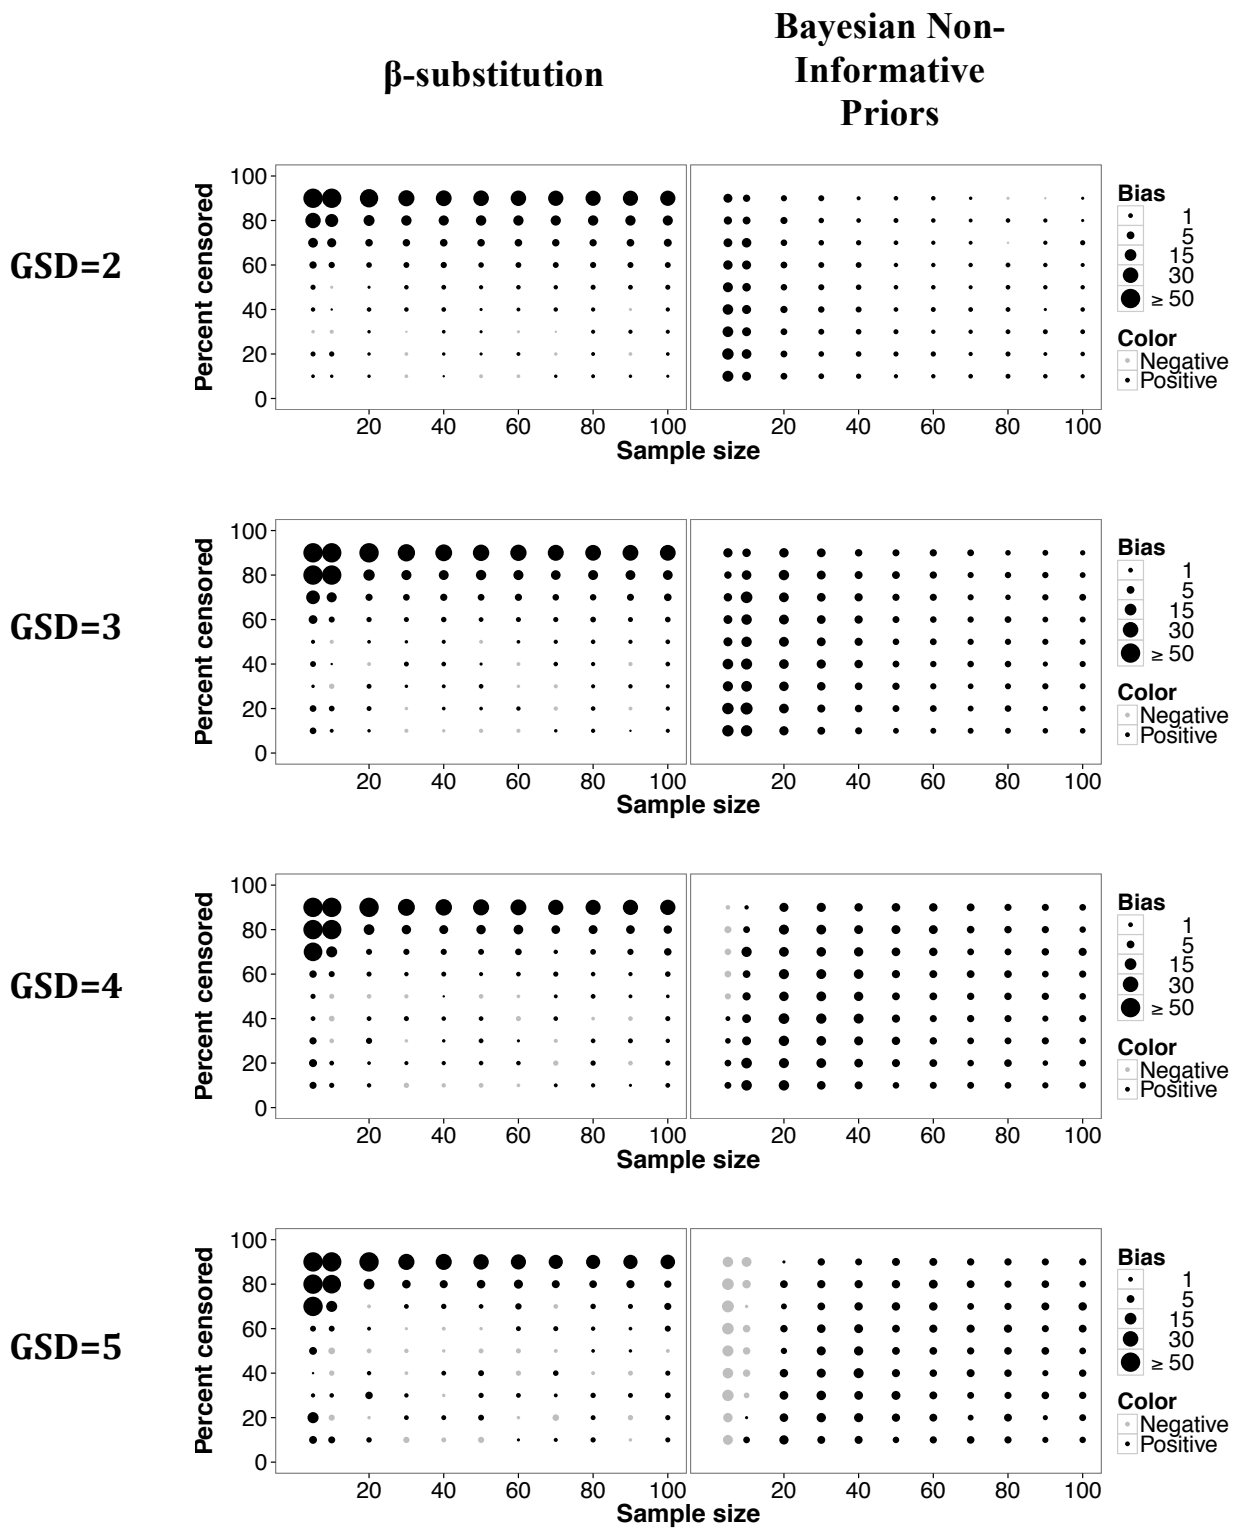

Figure 3: Relative bias in the estimate of the AM of a lognormal distribution and large gap multiple LODs for different sample sizes, percent censoring, and GSDs for the  $\beta$ -substitution method and the Bayesian method with non-informative priors. When  $p_1$  is at 90%, the expected level of censoring is actually about 60% (the average for the three LODs).

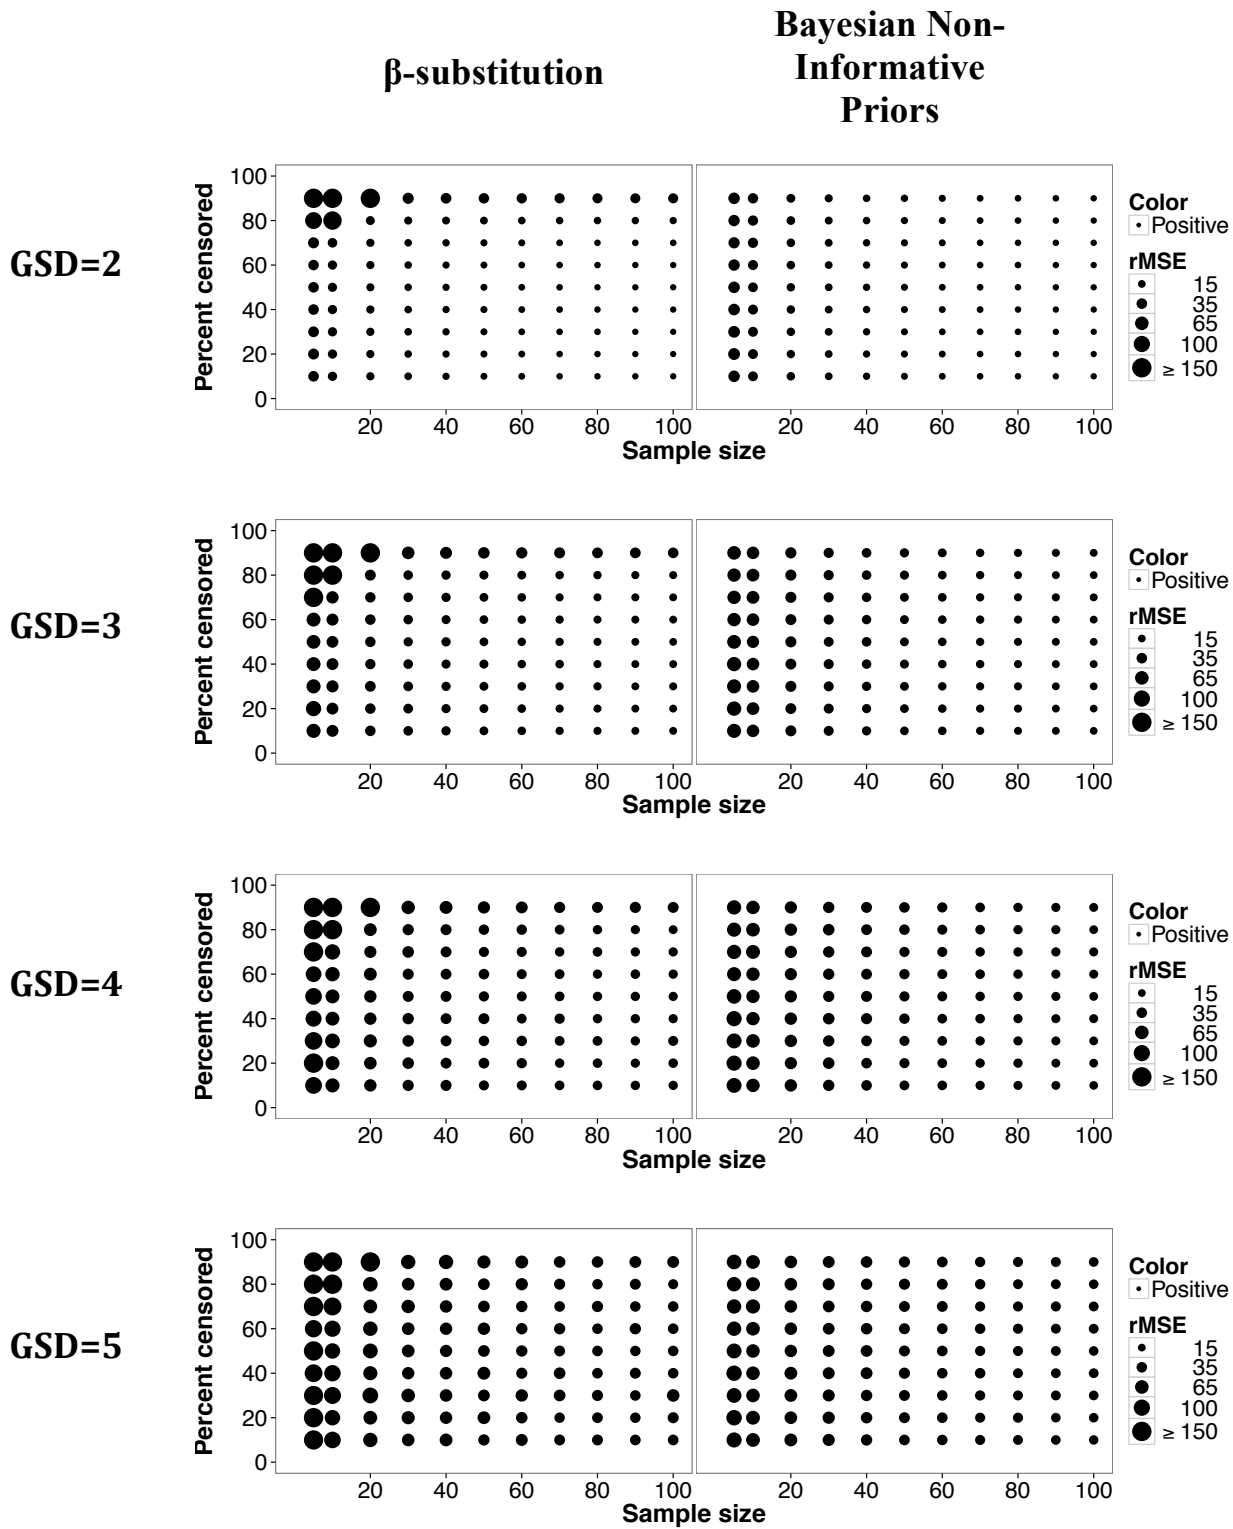

Figure 4: Relative rMSE in the estimate of the AM of a lognormal distribution and large gap multiple LODs for different sample sizes, percent censoring, and GSDs for the  $\beta$ -substitution method and the Bayesian method with non-informative priors. When  $p_1$  is at 90%, the expected level of censoring is actually about 60%.

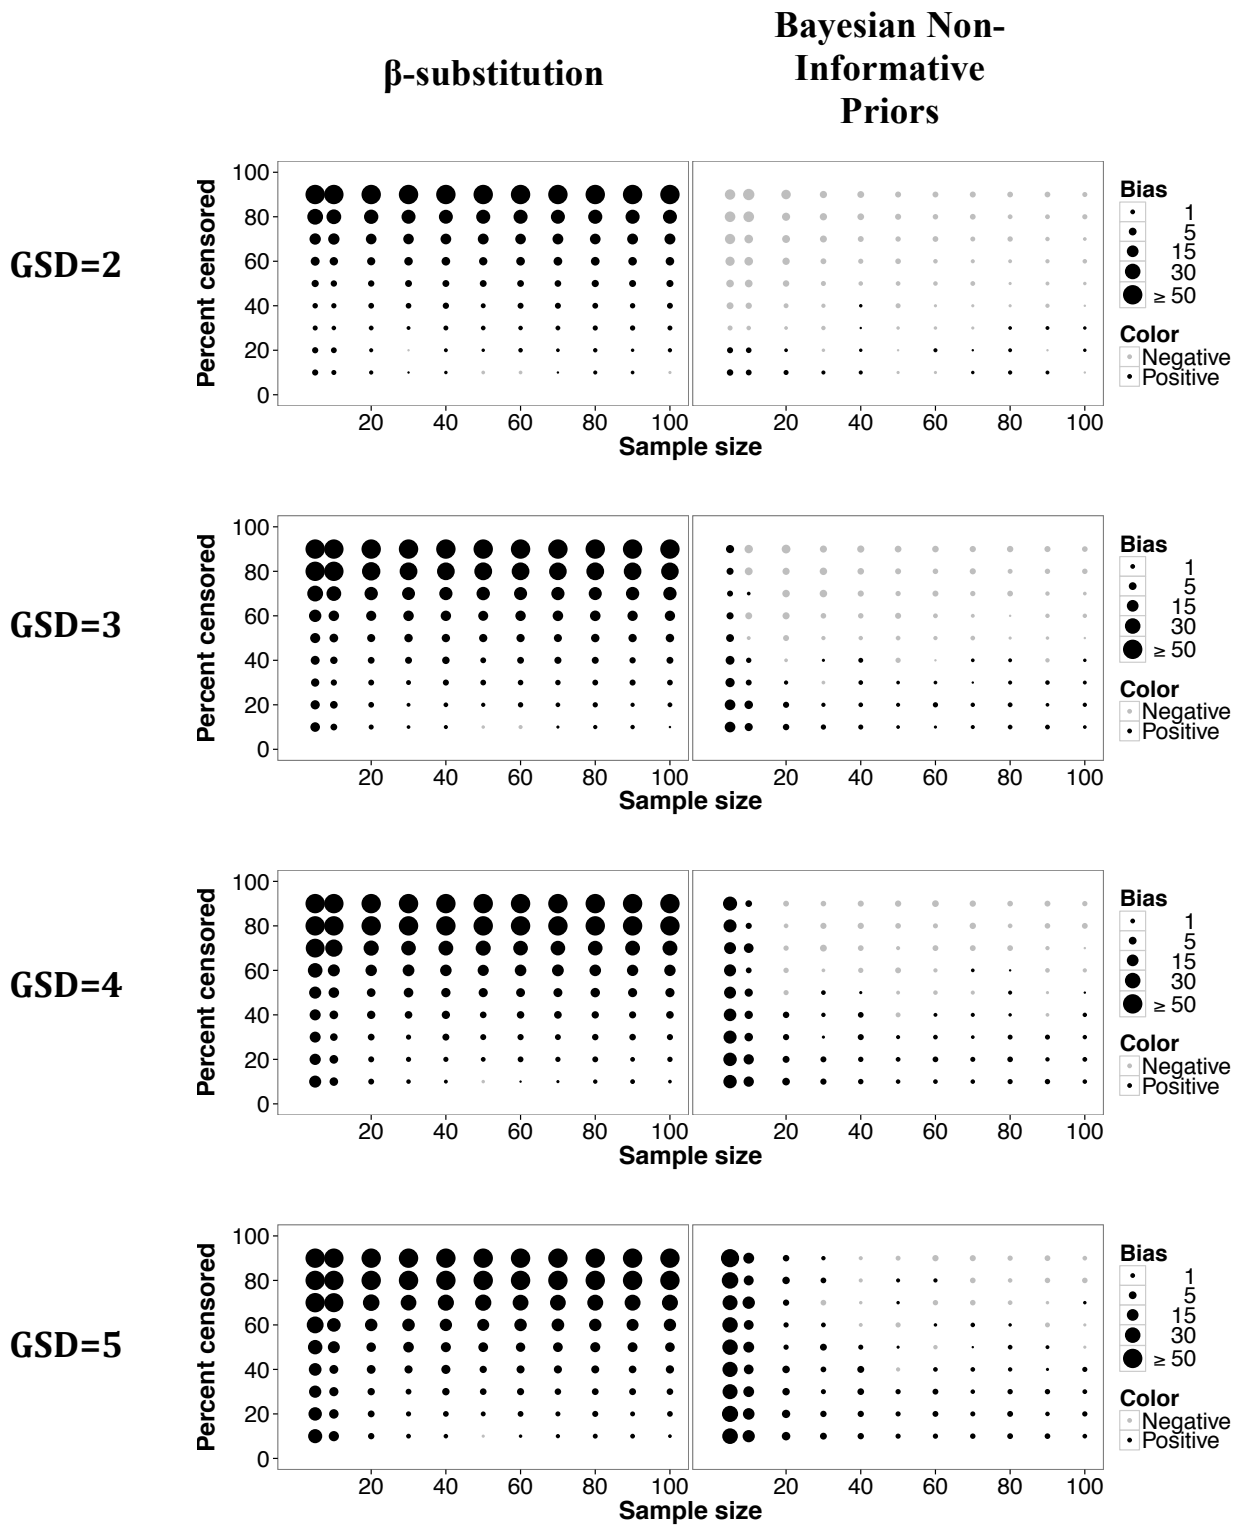

Figure 5: Relative bias in the estimate of the GM of a lognormal distribution and large gap multiple LODs for different sample sizes, percent censoring, and GSDs for the  $\beta$ -substitution method and the Bayesian method with non-informative priors. When  $p_1$  is at 90%, the expected level of censoring is actually about 60%.

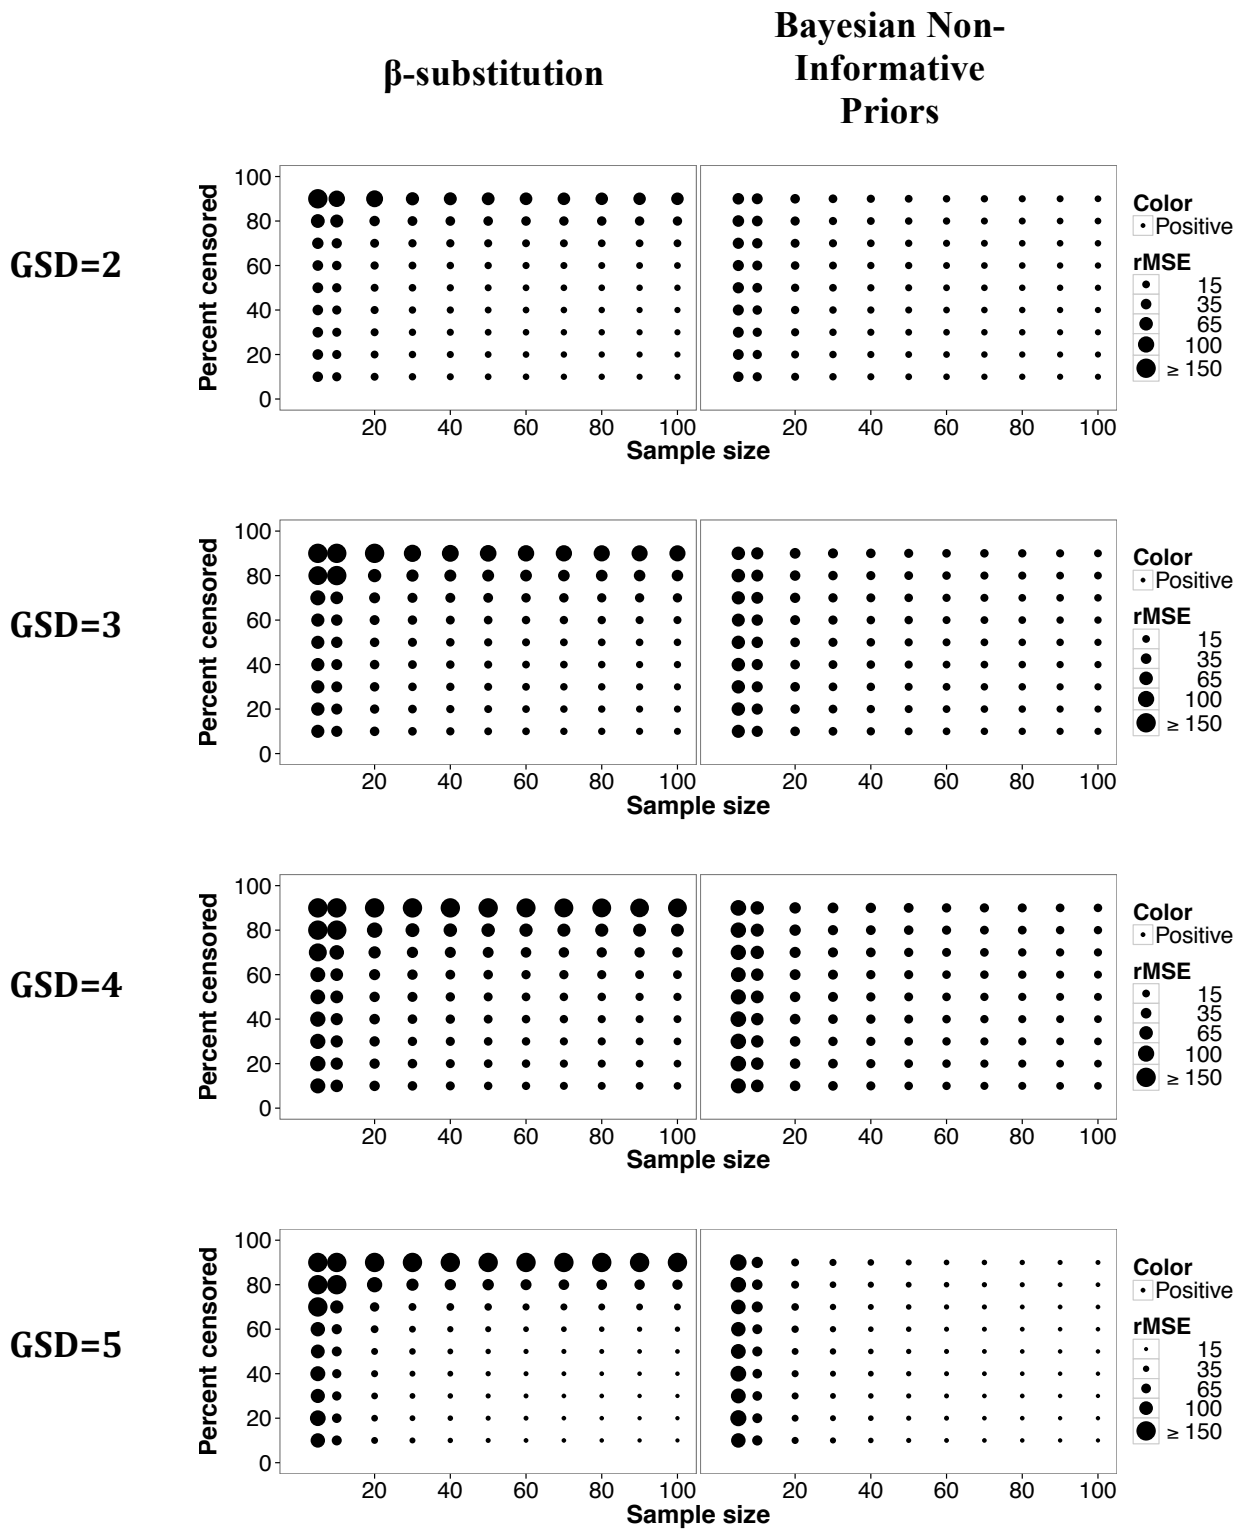

Figure 6: Relative rMSE in the estimate of the GM of a lognormal distribution and large gap multiple LODs for different sample sizes, percent censoring, and GSDs for the  $\beta$ -substitution method and the Bayesian method with non-informative priors. When  $p_1$  is at 90%, the expected level of censoring is actually about 60%.

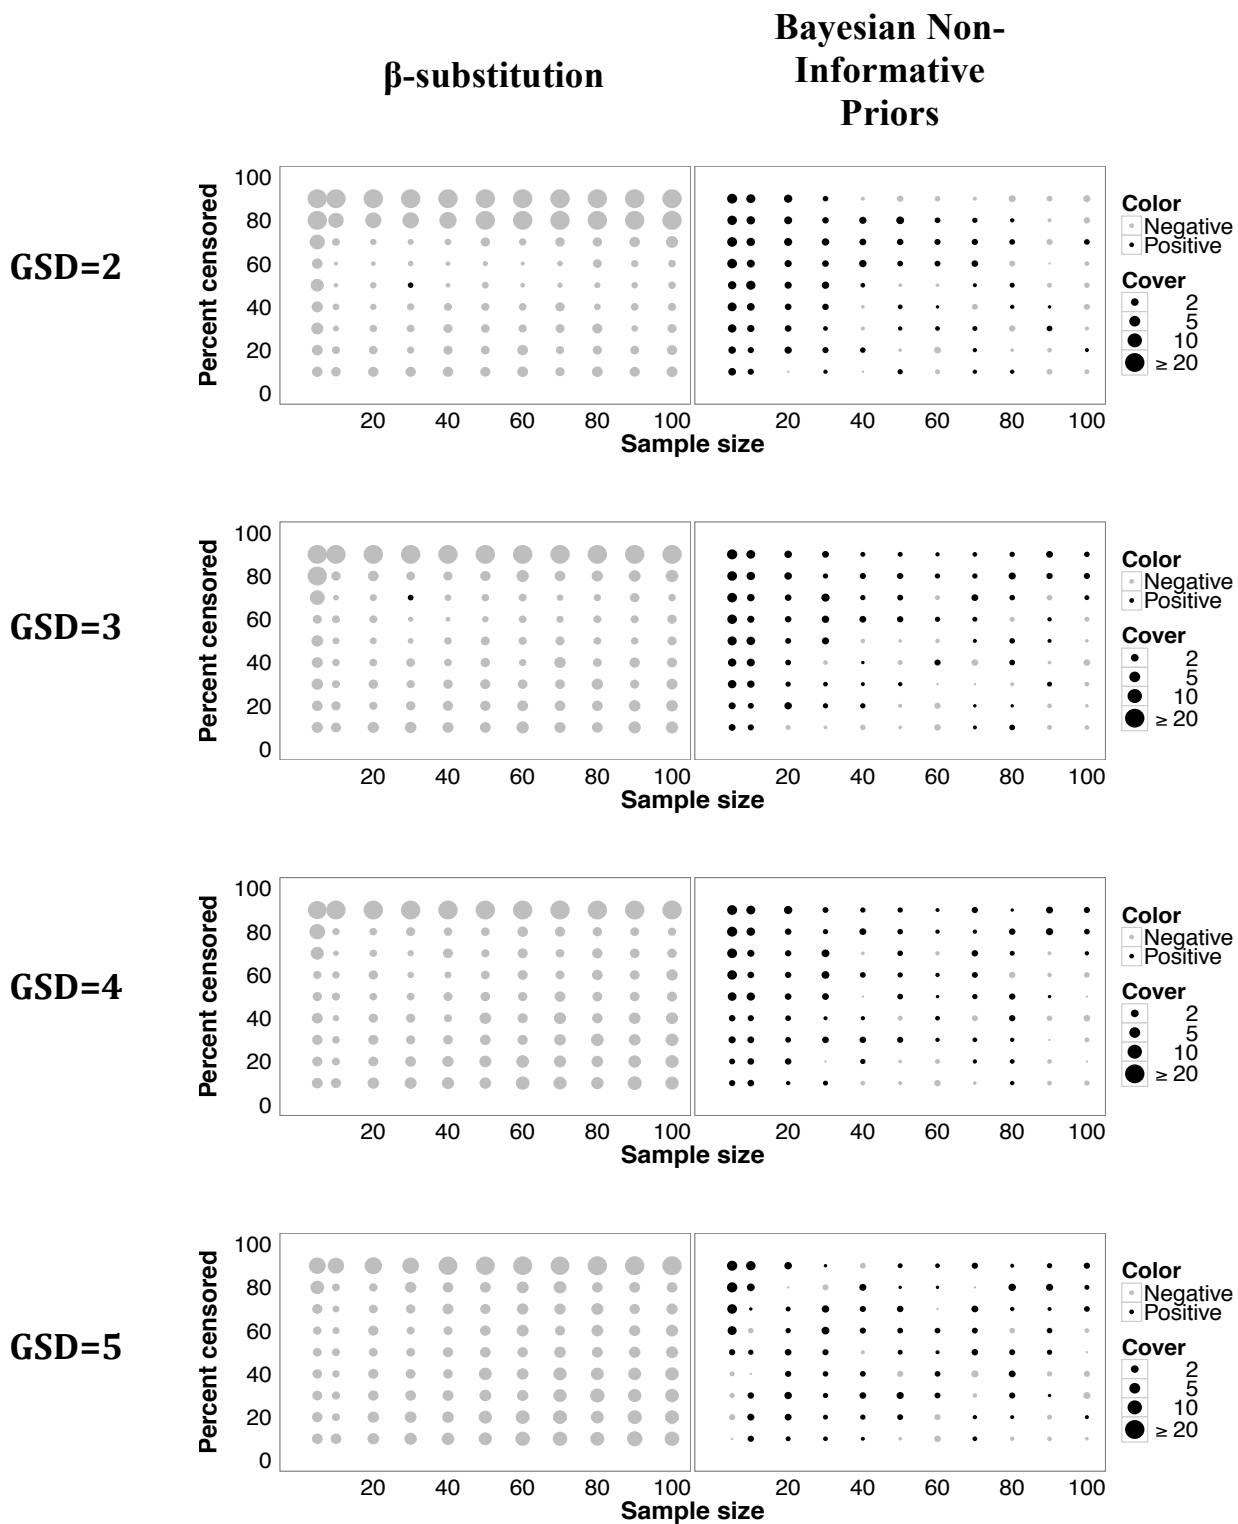

Figure 7: Coverage probabilities (in percent) for the AM of a lognormal distribution and large gap multiple LODs for the  $\beta$ -substitution method and the Bayesian method with non-informative priors. The size of the circle represents difference between the actual coverage probability minus the target 95%. When  $p_1$  is at 90%, the expected level of censoring is actually about 60%.



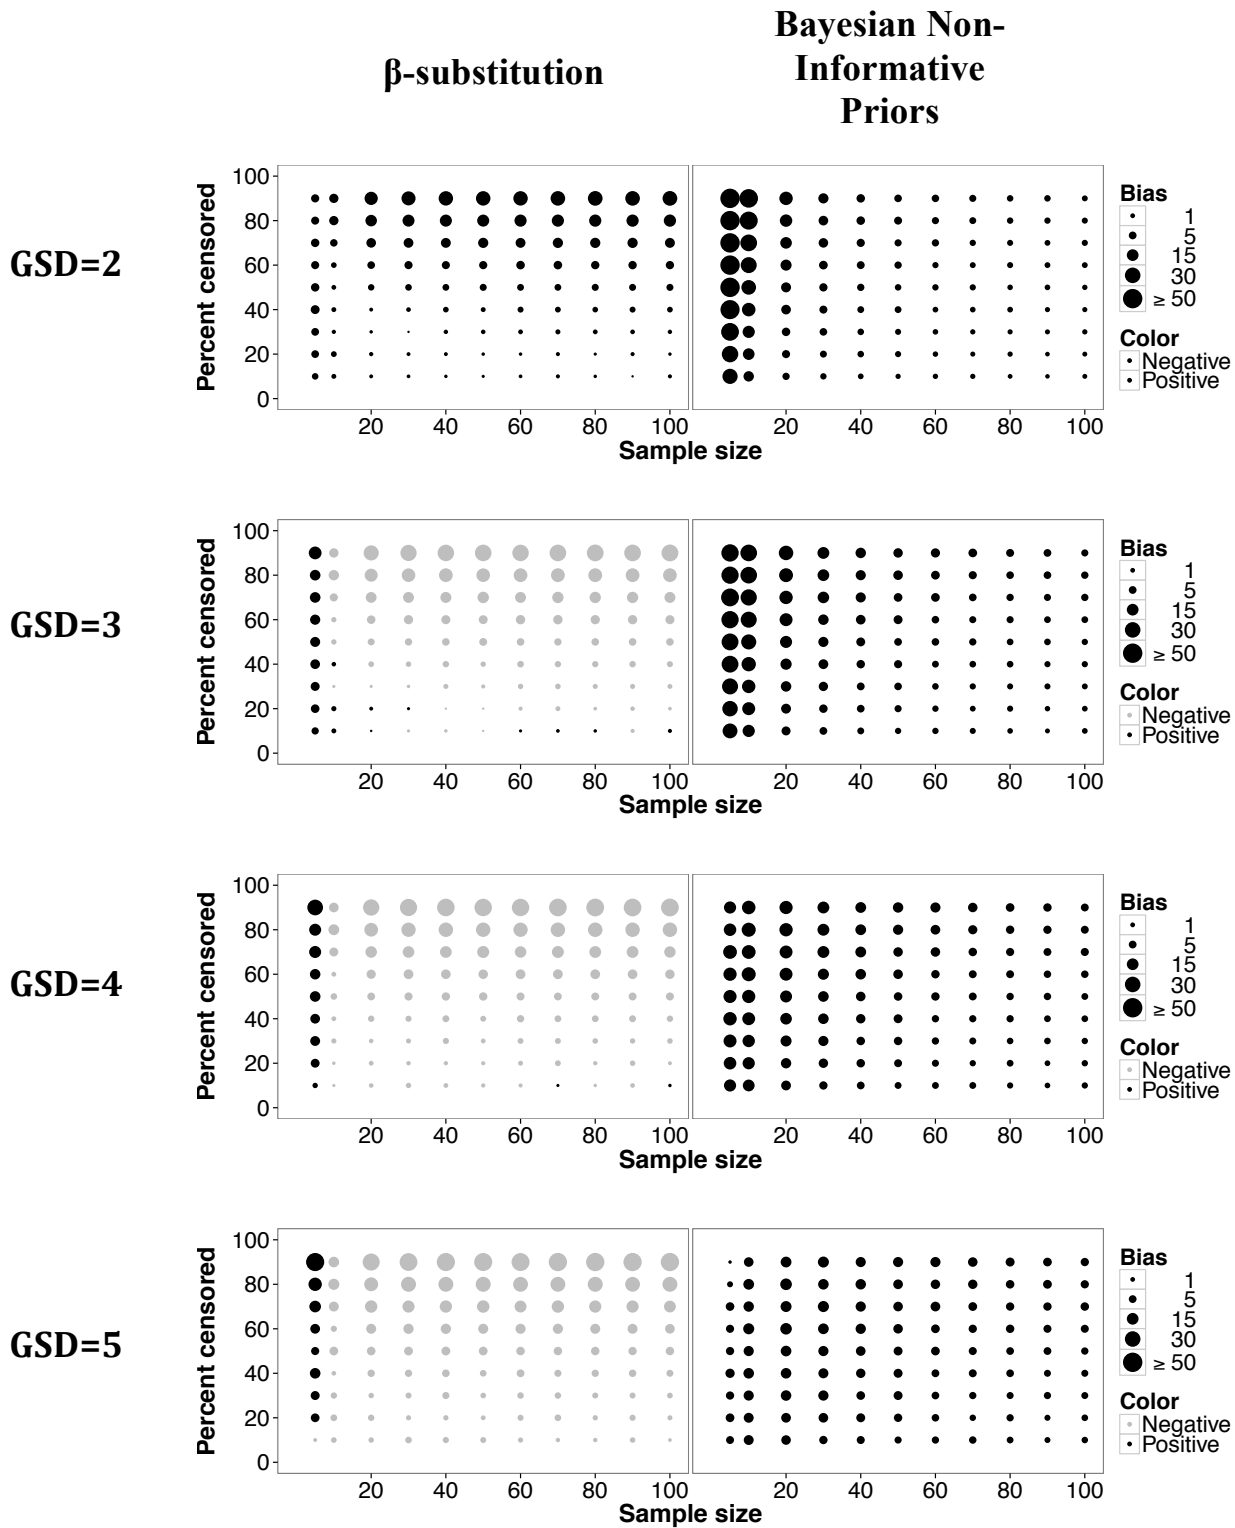

Figure 8: Relative bias in the estimate of the GSD of a lognormal distribution and large gap multiple LODs for different sample sizes, percent censoring, and GSDs for the  $\beta$ -substitution method and the Bayesian method with non-informative priors. When  $p_1$  is at 90%, the expected level of censoring is actually about 60%.

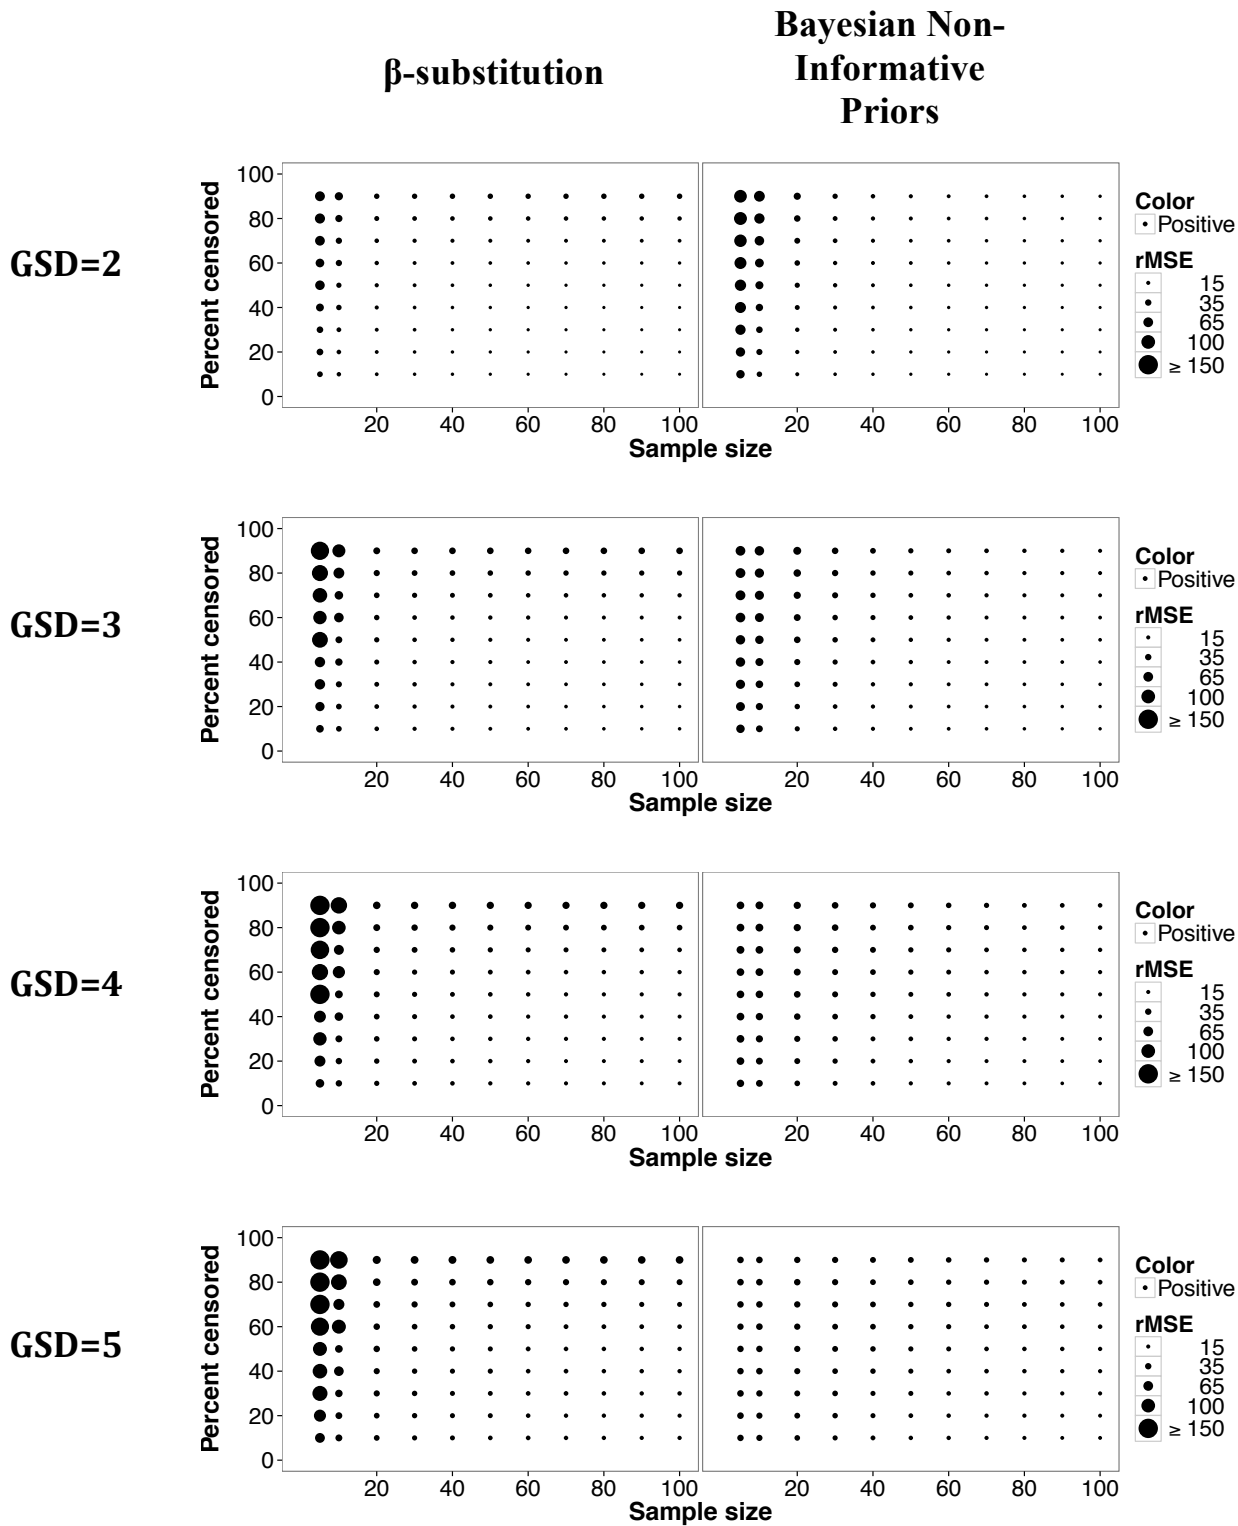

Figure 9: Relative rMSE in the estimate of the GSD of a lognormal distribution and large gap multiple LODs for different sample sizes, percent censoring, and GSDs for the  $\beta$ -substitution method and the Bayesian method with non-informative priors. When  $p_1$  is at 90%, the expected level of censoring is actually about 60%.

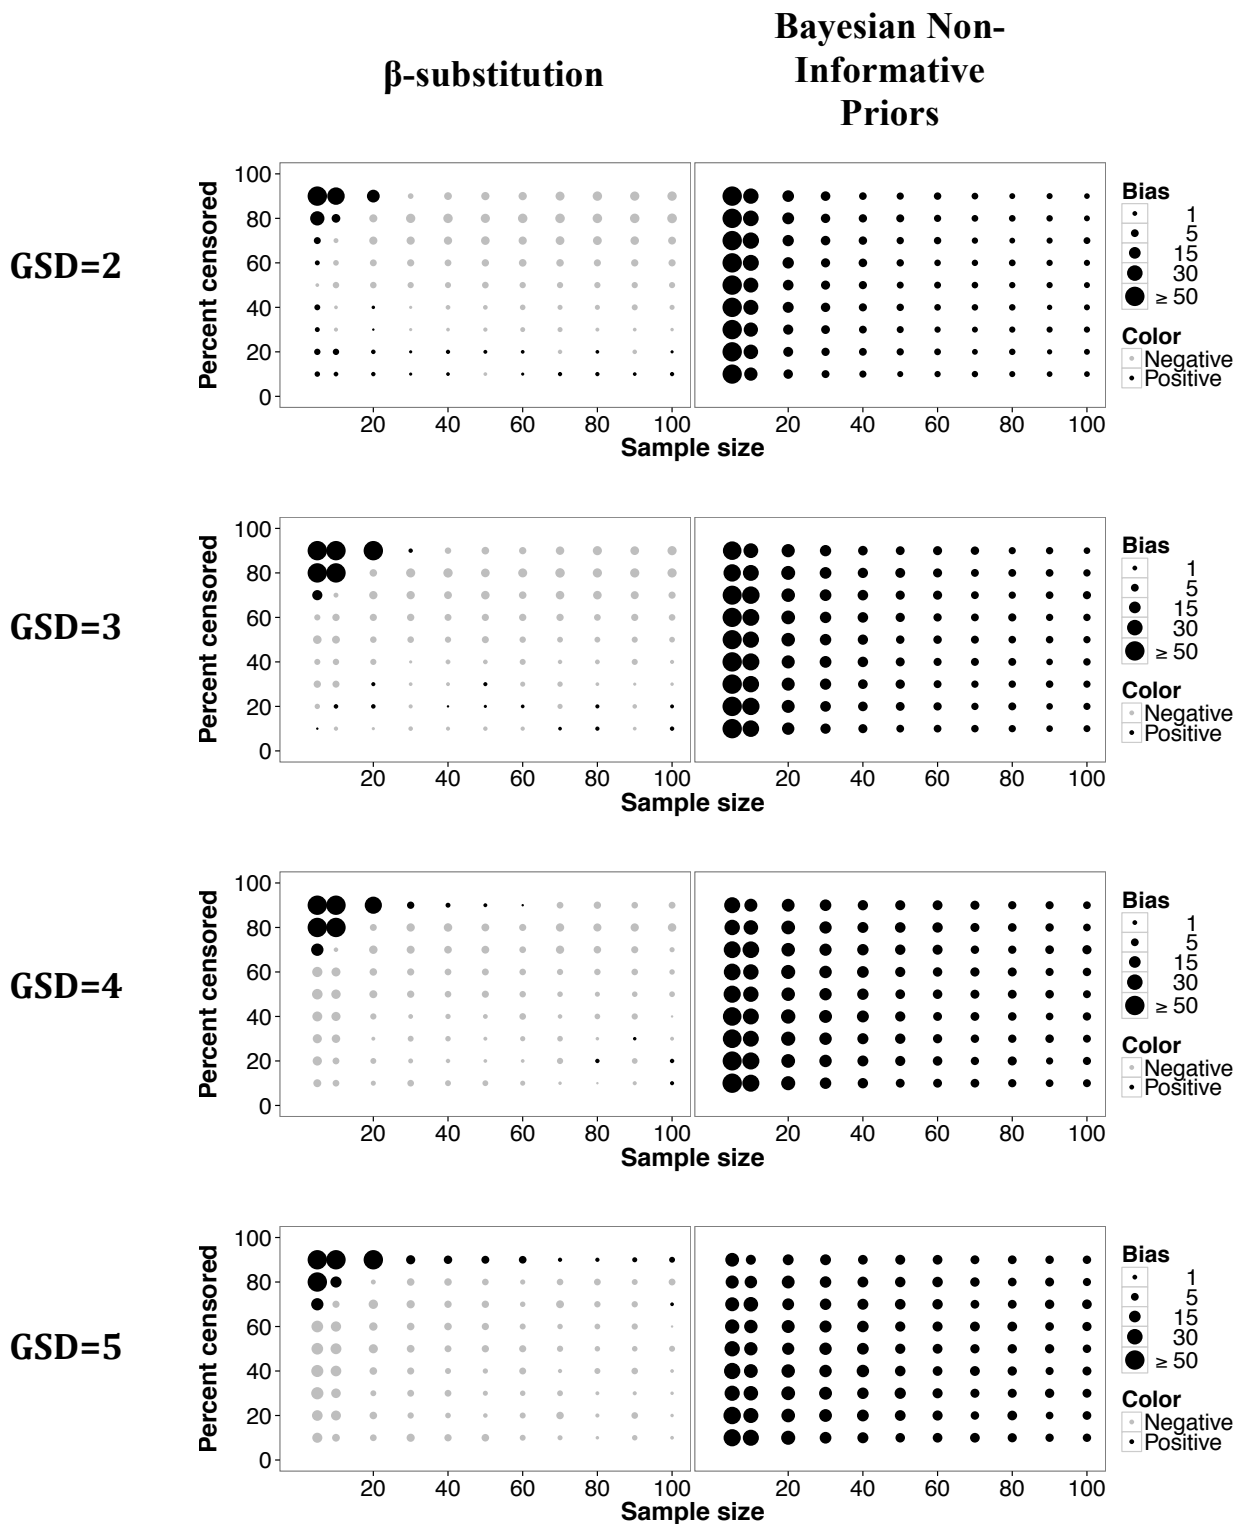

Figure 10: Relative bias in the estimate of the 95<sup>th</sup> percentile of a lognormal distribution and large gap multiple LODs for different sample sizes, percent censoring, and GSDs for the  $\beta$ -substitution method and the Bayesian method with non-informative priors. When  $p_1$  is at 90%, the expected level of censoring is actually about 60%.

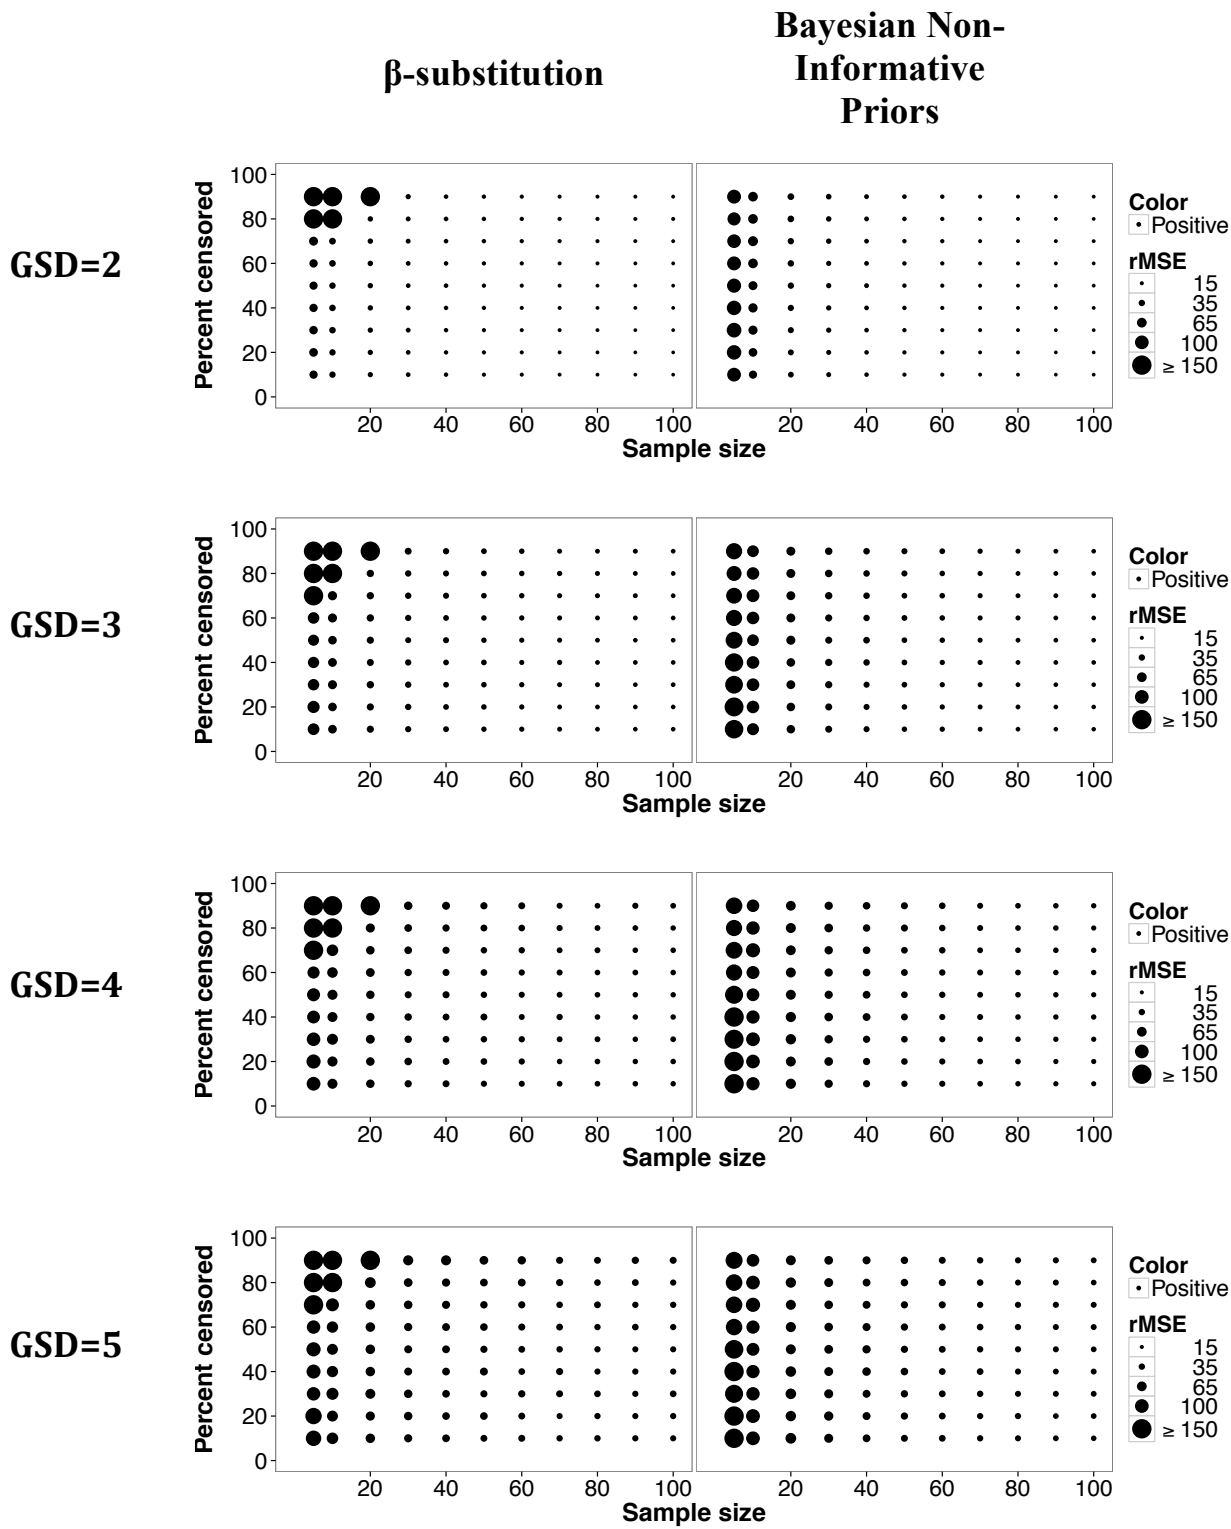

Figure 11: Relative rMSE in the estimate of the 95<sup>th</sup> percentile of a lognormal distribution and large gap multiple LODs for different sample sizes, percent censoring, and GSDs for the  $\beta$ -substitution method and the Bayesian method with non-informative priors. When  $p_1$  is at 90%, the expected level of censoring is actually about 60%.

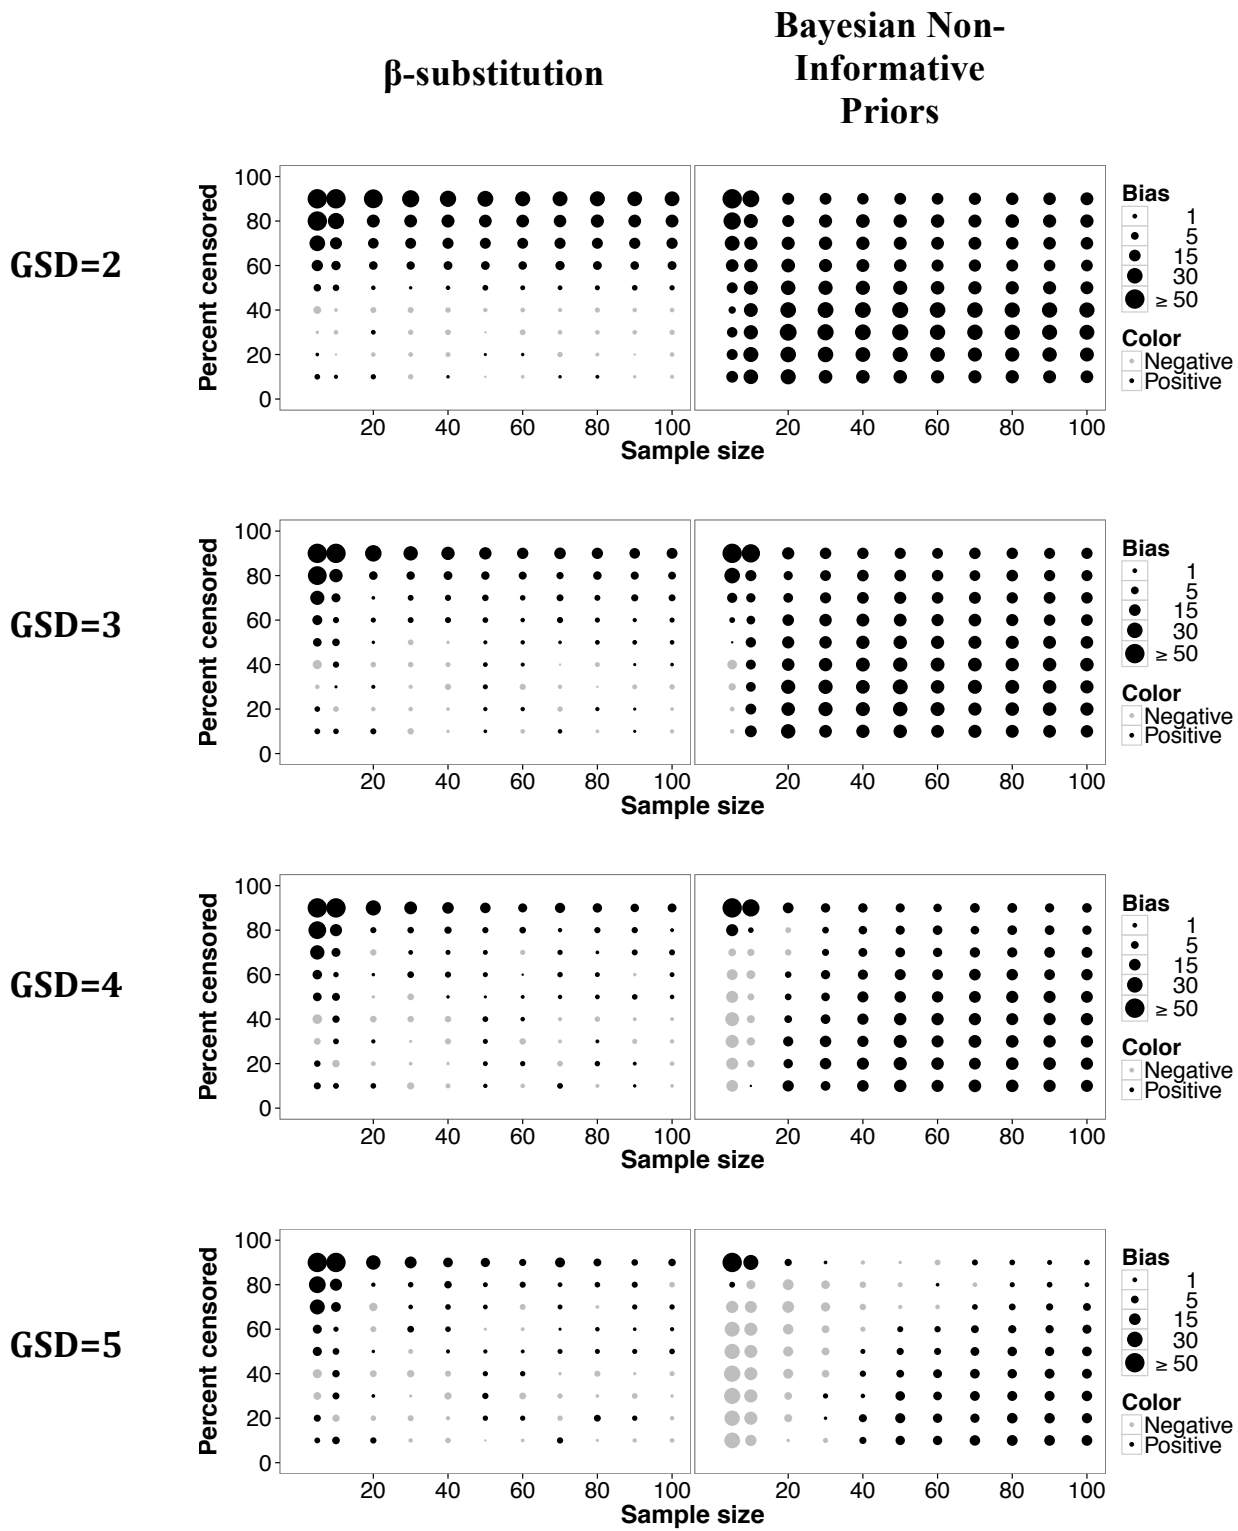

Figure 12: Relative bias in the estimate of the AM of a mixed distribution (GMs=1 and 10) and a single LOD for different sample sizes, percent censoring, and GSDs for the  $\beta$ -substitution method and the Bayesian method with non-informative priors.

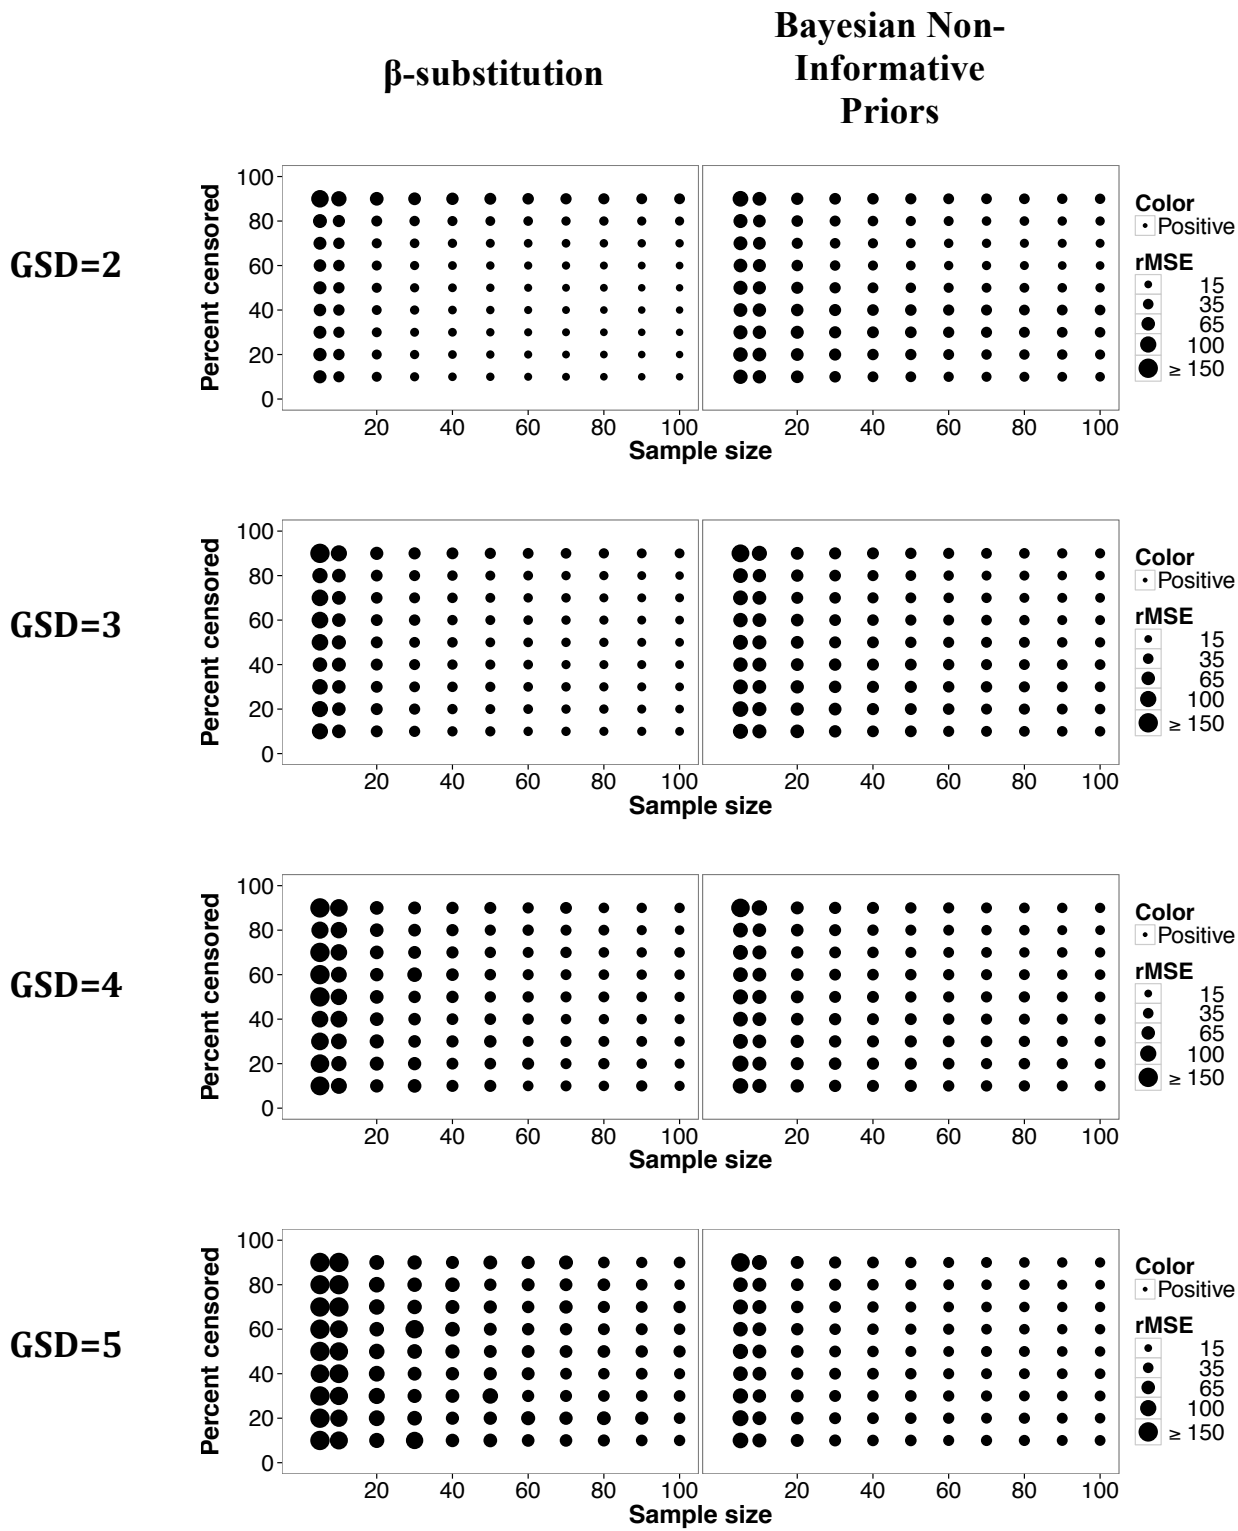

Figure 13: Relative rMSE in the estimate of the AM of a mixed distribution (GMs =1 and 10) and a single LOD for different sample sizes, percent censoring, and GSDs for the  $\beta$ -substitution method and the Bayesian method with non-informative priors.

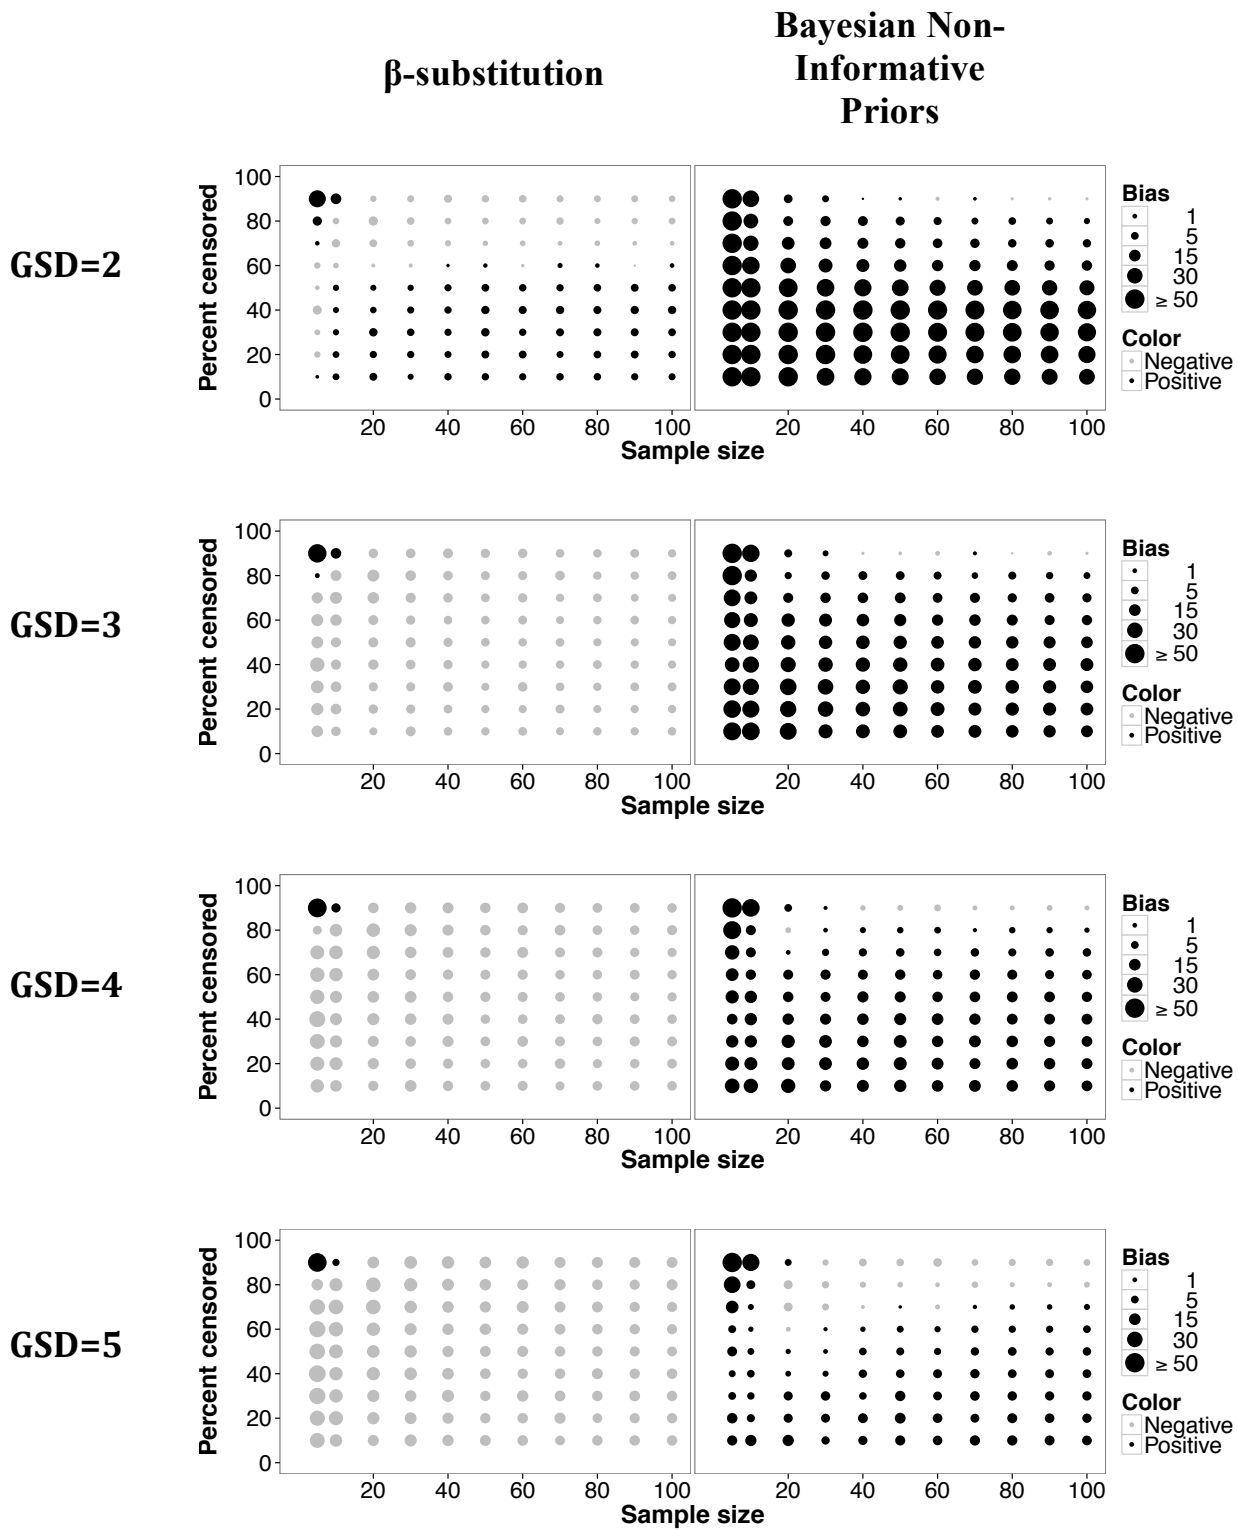

Figure 14: Relative bias in the estimate of the 95<sup>th</sup> percentile of a mixed distribution (GMs = 1 and 10) and a single LOD for different sample sizes, percent censoring, and GSDs for the  $\beta$ -substitution method and the Bayesian method with non-informative priors.

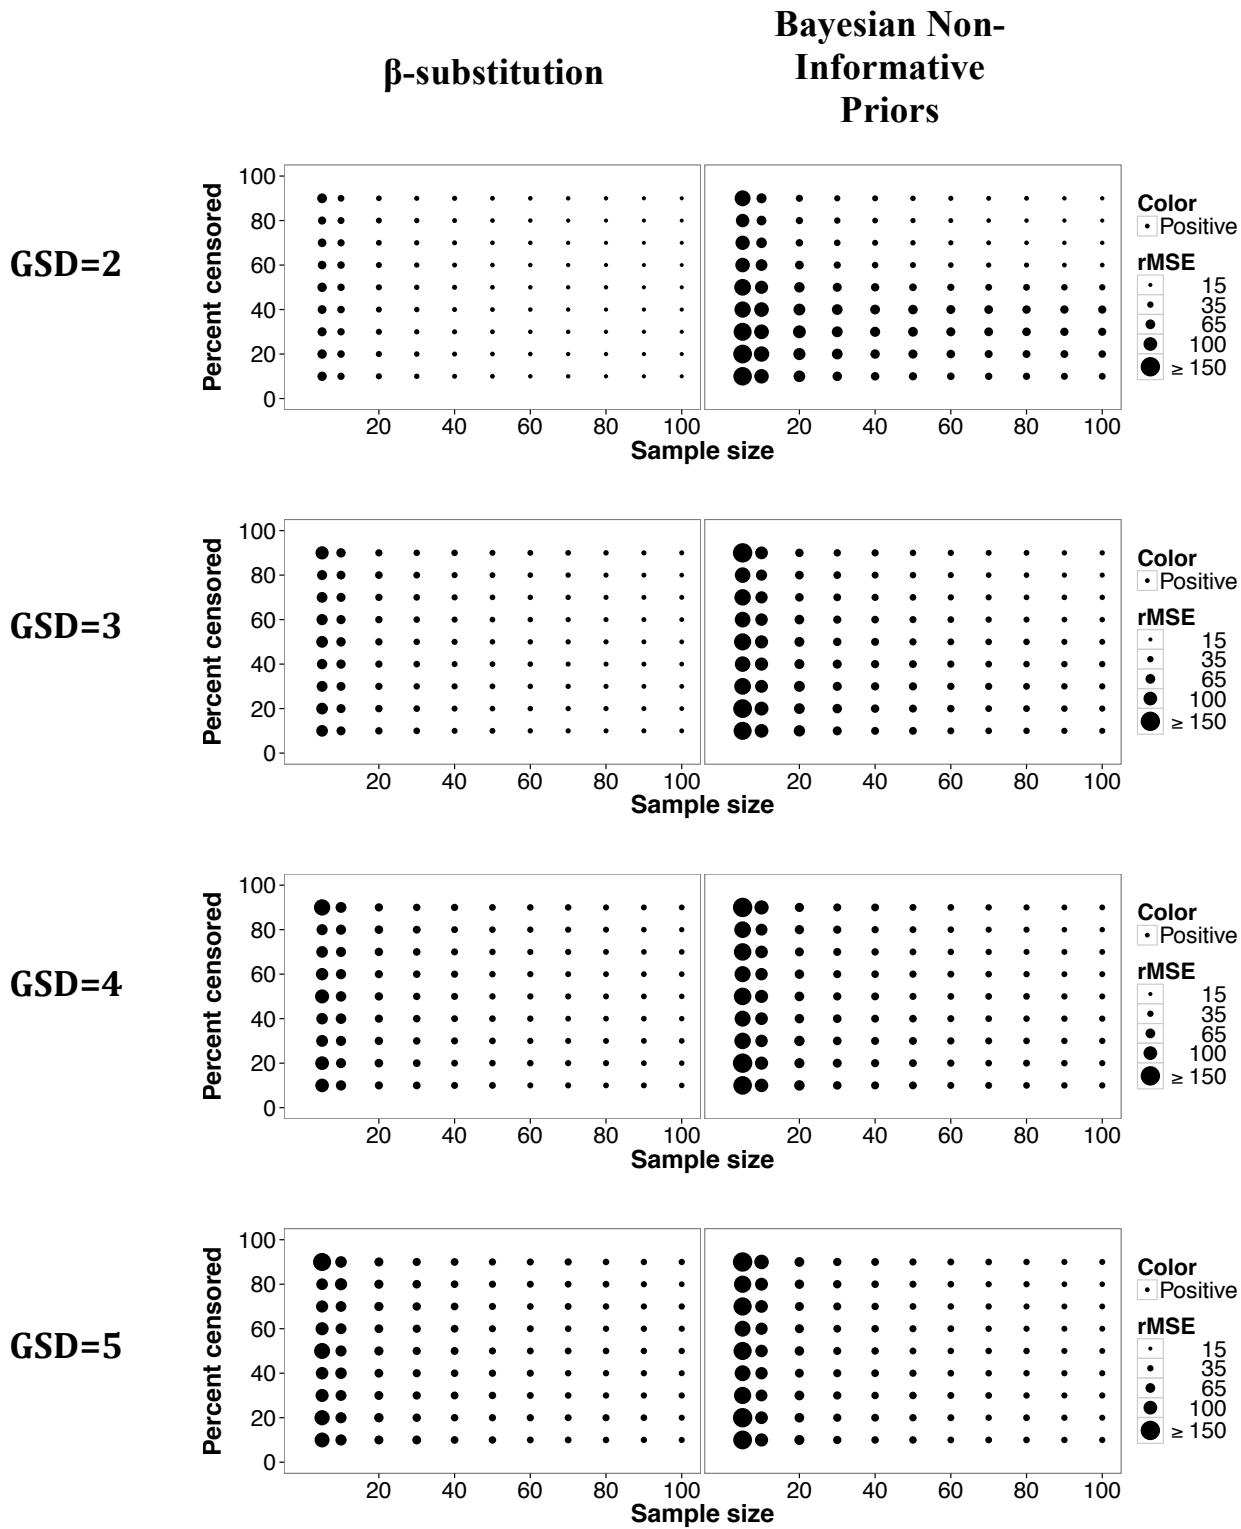

Figure 15: Relative rMSE in the estimate of the 95<sup>th</sup> percentile of a mixed distribution (GMs = 1 and 10) and a single LOD for different sample sizes, percent censoring, and GSDs for the  $\beta$ -substitution method and the Bayesian method with non-informative priors.



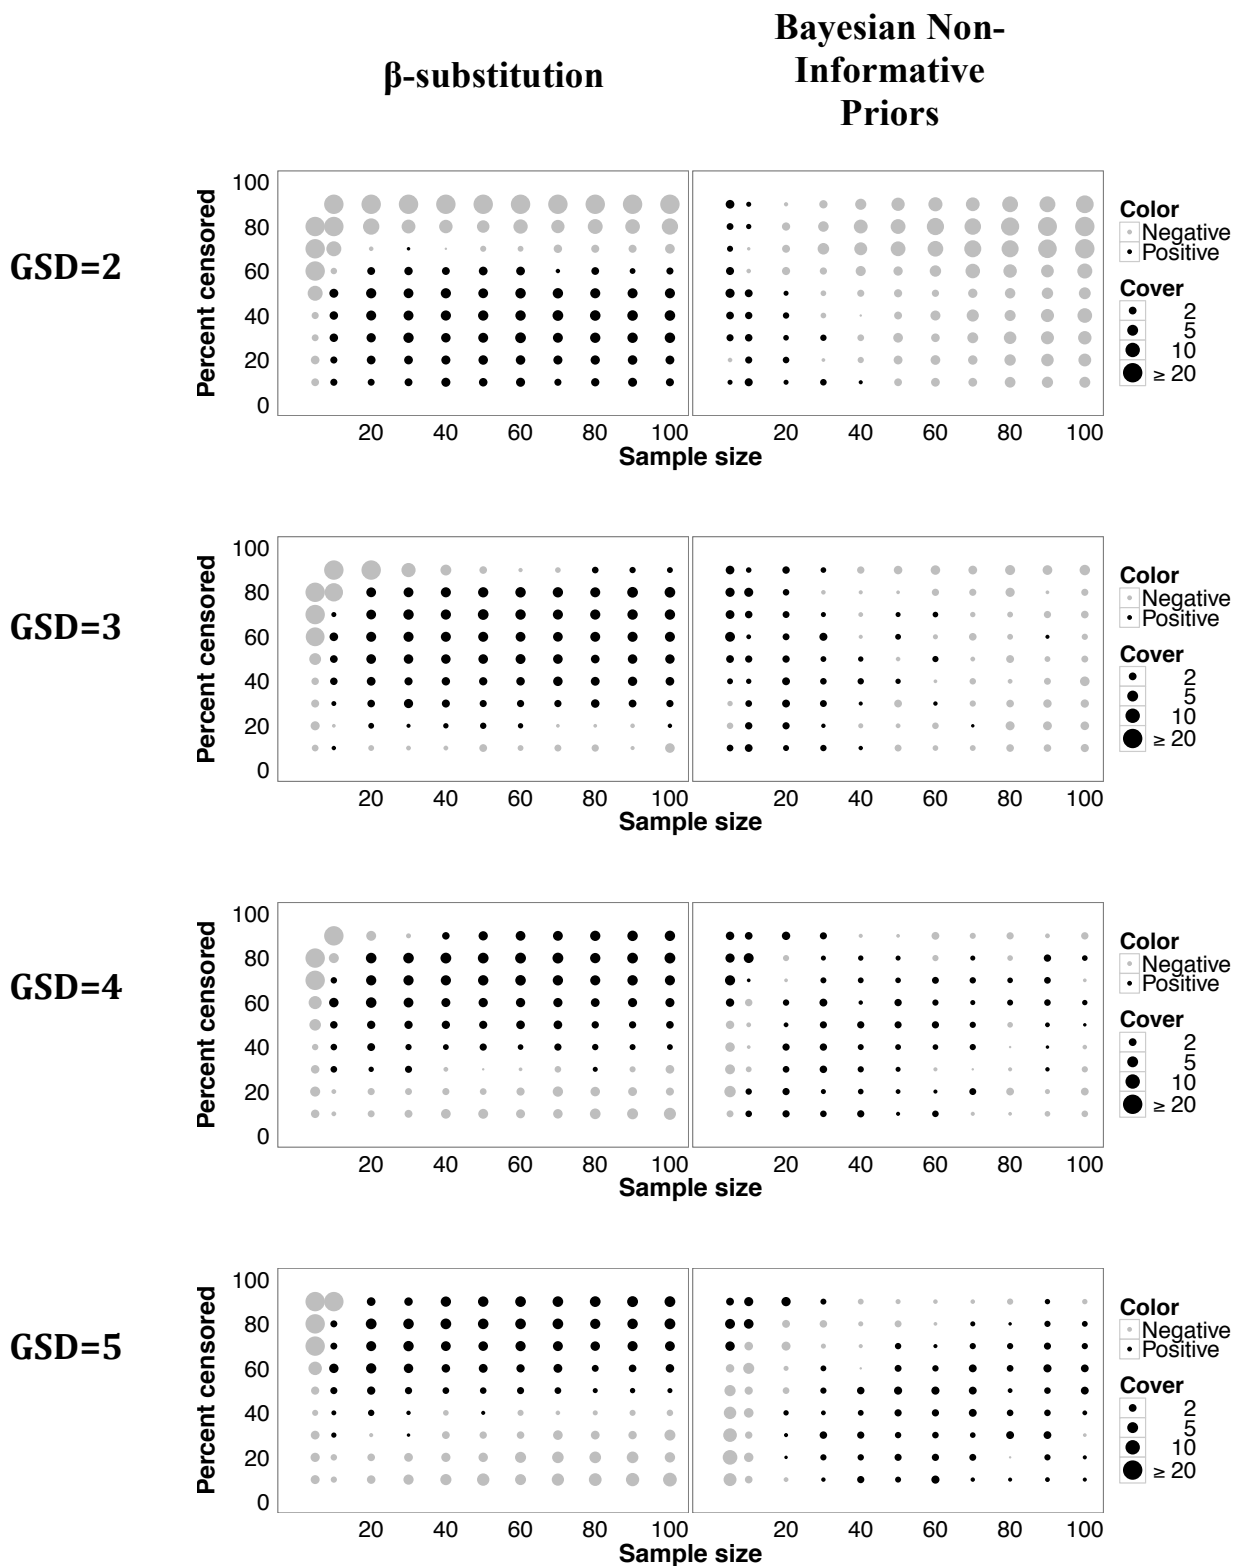

Figure 16: Coverage probabilities (in percent) for the AM of a mixed distribution (GMs =1 and 10) and a single LOD for the  $\beta$ -substitution method and the Bayesian method with non-informative priors. The size of the circle represents difference between the actual coverage probability minus the target 95%. When  $p_1$  is at 90%, the expected level of censoring is actually about 60%
